# Supplementary material for: To stay or to go: resource diversity alters the dispersal behavior of sympatric cryptic marine nematodes
Source: PeerJ. 2025 Jan 13;13:e18790. doi: 10.7717/peerj.18790 (PMC11737338; doi:10.7717/peerj.18790)
Supplement: Supplemental Information 2 — The legend for each data point is available in "Metadata". [file peerj-13-18790-s002.xlsx]

## Sheet: Metadata
Title	Effects of resource diversity on active dispersal behaviour of 3 cryptic species of the nematode Litoditis marina
Study description (short)	Our study investigated the effects of food diversity on effective dispersal of three sympatric cryptic species of the marine nematode complex Litoditis marina (Pm I, Pm III and Pm IV) using microcosms consisting of a local patch (i.e. inoculation plate), connection tube, and distant patch (i.e. dispersal plate). The patches had either identical or varying food-diversity treatments (Escherichia co…
Excel sheetname	Description/sampling protocol/methodology for analysis
analysis1	Active dispersal data in "homogeneous patches" with the same bacterial food treatments both in the inoculation and distant patches
	*Homegeneous patches-setup: To investigate how food diversity affects the dispersal rates of L. marina (Pm I and Pm III) in homogeneous patches, 50-µl suspensions of the same bacterial food treatments were added both in the inoculation and distant patches. The E-E, L-L, M-M, and H-H treatments consisted of E. coli, low, medium or high-diversity food on both plates, respectively.
analysis2	Active dispersal data in "heteregenous patches" with different-distant patch conditions
	*Heteregeneous patches-setup with different distant-patch conditions with E. coli as food in local patches: We investigated whether food diversity is an important driver for the dispersal of the cryptic species by adding 50-µl suspensions of a single-strain resource (E. coli K12) in local patches, and an equal amount of bacterial suspensions of low-, medium-, and high-diversity food in the distan…
analysis3_L	Active dispersal data in "heteregenous patches" with different-local patch conditions and low-diversity food in distant patches. Dispersal was checked toward distant patches with low-diversity food.
	*Heteregeneous patches-setup with different local-patch conditions and low-diversity food in distant patches: Dispersal was investigated toward distant patches with 50 µl of low-diversity food and with varying food-diversity treatments in local patches.
analysis3_M	Active dispersal data in "heteregenous patches" with different-local patch conditions and medium-diversity food in distant patches. Dispersal was checked toward distant patches with medium-diversity food.
	*Heteregeneous patches-setup with different local-patch conditions and medium-diversity food in distant patches: Dispersal was investigated toward distant patches with 50 µl of medium-diversity food and with varying food-diversity treatments in local patches.
analysis3_H	Active dispersal data in "heteregenous patches" with different-local patch conditions. Dispersal was checked toward distant patches with high-diversity food.
	*Heteregeneous patches-setup with different local-patch conditions and high-diversity food in distant patches: Dispersal was investigated toward distant patches with 50 µl of high-diversity food and with varying food-diversity treatments in local patches.
Excel sheetname	Parameter	Definition
analysis1	species	The cryptic species of L. marina used for the dispersal experiments with 2 levels: Pm I and Pm III
analysis1	treatment	The treatments for the dispersal experiments experiments with 4 levels: E-E (with E. coli in local and distant patches), L-L (with low-diversity food in local and distant patches), M-M (with medium-diversity food in local and distant patches), and H-H (with high-diversity food in local and distant patches).
analysis1	replicate	The replicates for the dispersal experiments. At least three replicates were used for each treatment and each cryptic species of L. marina.
analysis1	day.dispersal	The day of dispersal of each cryptic species of L. marina towards different food treatments.
analysis1	no.inoculation.plate	The number of adult nematodes in the inoculation plate (i.e. local patch) at the time of first effective dispersal of each cryptic species of L. marina
analysis1	no.dispersal.plate	The number of adult nematodes in the dispersal plate (i.e. distant patch) at the time of first effective dispersal of each cryptic species of L. marina
analysis2	species	The cryptic species of L. marina used for the dispersal experiments with 3 levels: Pm I, Pm III and Pm IV
analysis2	treatment	The treatments for the dispersal experiments experiments with 4 levels: E-E (with E. coli in local and distant patches), E-L (with E. coli in the local patch and low-diversity food in the distant patch), E-M (with E. coli in the local patch and medium-diversity food in the distant patch), and E-H (with E. coli in the local patch and high-diversity food in the distant patch).
analysis2	replicate	The replicates for the dispersal experiments. Four replicates were used for each treatment and each cryptic species of L. marina.
analysis2	day.dispersal	The day of dispersal of each cryptic species of L. marina towards different food treatments.
analysis2	no.inoculation.plate	The number of adult nematodes in the inoculation plate (i.e. local patch) at the time of first effective dispersal of each cryptic species of L. marina
analysis2	no.dispersal.plate	The number of adult nematodes in the dispersal plate (i.e. distant patch) at the time of first effective dispersal of each cryptic species of L. marina
analysis3_L	species	The cryptic species of L. marina used for the dispersal experiments with 2 levels: Pm I and Pm III
analysis3_L	treatment	The treatments for the dispersal experiments experiments with 2 levels: E-L (with E. coli in the local patch and low-diversity food in the distant patch) and L-L (with low-diversity food both in local and distant patches)
analysis3_L	replicate	The replicates for the dispersal experiments. At least three replicates were used for each treatment and each cryptic species of L. marina.
analysis3_L	day.dispersal	The day of dispersal of each cryptic species of L. marina towards different food treatments.
analysis3_L	no.inoculation.plate	The number of adult nematodes in the inoculation plate (i.e. local patch) at the time of first effective dispersal of each cryptic species of L. marina
analysis3_L	no.dispersal.plate	The number of adult nematodes in the dispersal plate (i.e. distant patch) at the time of first effective dispersal of each cryptic species of L. marina
analysis3_M	species	The cryptic species of L. marina used for the dispersal experiments with 2 levels: Pm I and Pm III
analysis3_M	treatment	The treatments for the dispersal experiments experiments with 3 levels: E-M (with E. coli in the local patch and medium-diversity food in the distant patch) and L-M (with low-diversity food in the local patch and medium-diversity food in the distant patch), and M-M (with medium-diversity food both in local and distant patches).
analysis3_M	replicate	The replicates for the dispersal experiments. At least three replicates were used for each treatment and each cryptic species of L. marina.
analysis3_M	day.dispersal	The day of dispersal of each cryptic species of L. marina towards different food treatments.
analysis3_M	no.inoculation.plate	The number of adult nematodes in the inoculation plate (i.e. local patch) at the time of first effective dispersal of each cryptic species of L. marina
analysis3_M	no.dispersal.plate	The number of adult nematodes in the dispersal plate (i.e. distant patch) at the time of first effective dispersal of each cryptic species of L. marina
analysis3_H	species	The cryptic species of L. marina used for the dispersal experiments with 2 levels: Pm I and Pm III
analysis3_H	treatment	The treatments for the dispersal experiments experiments with 4 levels: E-H (with E. coli in the local patch and high-diversity food in the distant patch) and L-H (with low-diversity food in the local patch and high-diversity food in the distant patch), M-H (with medium-diversity food in the local patch and high-diversity food in the distant patch), and H-H (with high-diversity food both in local…
analysis3_H	replicate	The replicates for the dispersal experiments. At least three replicates were used for each treatment and each cryptic species of L. marina.
analysis3_H	day.dispersal	The day of dispersal of each cryptic species of L. marina towards different food treatments.
analysis3_H	no.inoculation.plate	The number of adult nematodes in the inoculation plate (i.e. local patch) at the time of first effective dispersal of each cryptic species of L. marina
analysis3_H	no.dispersal.plate	The number of adult nematodes in the dispersal plate (i.e. distant patch) at the time of first effective dispersal of each cryptic species of L. marina

## Sheet: analysis1
species	treatment	replicate	day.dispersal	no.inoculation.plate	no.dispersal.plate
Pm I	E-E	E1	14	55	1
Pm I	E-E	E2	14	68	1
Pm I	E-E	E3	16	80	2
Pm I	E-E	E4	15	75	1
Pm III	E-E	E1	3	10	1
Pm III	E-E	E2	4	12	1
Pm III	E-E	E3	6	17	2
Pm III	E-E	E4	4	14	1
Pm I	L-L	L1-L1	4	6	1
Pm I	L-L	L2-L2	3	5	1
Pm I	L-L	L3-L3	3	5	1
Pm III	L-L	L1-L1	6	31	10
Pm III	L-L	L2-L2	7	50	15
Pm III	L-L	L3-L3	6	43	13
Pm I	M-M	M1-M1	5	4	2
Pm I	M-M	M2-M2	6	5	2
Pm I	M-M	M3-M3	5	3	3
Pm III	M-M	M1-M1	4	18	1
Pm III	M-M	M2-M2	4	15	2
Pm III	M-M	M3-M3	5	22	1
Pm I	H-H	H1-H1	1	3	3
Pm I	H-H	H2-H2	1	3	2
Pm I	H-H	H3-H3	1	3	3
Pm III	H-H	H1-H1	3	5	1
Pm III	H-H	H2-H2	2	5	1
Pm III	H-H	H3-H3	3	7	1

## Sheet: analysis2
species	treatment	replicate	day.dispersal	no.inoculation.plate	no.dispersal.plate
Pm I	E-E	EE1	14	55	1
Pm I	E-E	EE2	14	68	1
Pm I	E-E	EE3	16	80	2
Pm I	E-E	EE4	15	75	1
Pm I	E-L	EL1	6	5	1
Pm I	E-L	EL2	6	6	1
Pm I	E-L	EL3	7	8	1
Pm I	E-L	EL4	6	6	1
Pm I	E-M	EM1	5	5	1
Pm I	E-M	EM2	6	7	2
Pm I	E-M	EM3	5	5	1
Pm I	E-M	EM4	7	6	1
Pm I	E-H	EH1	3	5	1
Pm I	E-H	EH2	3	4	3
Pm I	E-H	EH3	4	4	3
Pm I	E-H	EH4	4	5	3
Pm III	E-E	EE1	3	10	1
Pm III	E-E	EE2	4	12	1
Pm III	E-E	EE3	6	17	2
Pm III	E-E	EE4	4	14	1
Pm III	E-L	EL1	8	86	1
Pm III	E-L	EL2	9	94	1
Pm III	E-L	EL3	10	140	4
Pm III	E-L	EL4	10	122	4
Pm III	E-M	EM1	5	7	1
Pm III	E-M	EM2	8	11	1
Pm III	E-M	EM3	7	5	1
Pm III	E-M	EM4	5	9	1
Pm III	E-H	EH1	5	17	2
Pm III	E-H	EH2	4	11	2
Pm III	E-H	EH3	7	23	2
Pm III	E-H	EH4	5	21	2
Pm IV	E-E	EE1	13	52	12
Pm IV	E-E	EE2	10	49	7
Pm IV	E-E	EE3	9	41	6
Pm IV	E-E	EE4	11	56	9
Pm IV	E-L	EL1	5	8	2
Pm IV	E-L	EL2	8	10	1
Pm IV	E-L	EL3	7	7	3
Pm IV	E-L	EL4	8	12	1
Pm IV	E-M	EM1	3	2	5
Pm IV	E-M	EM2	5	4	3
Pm IV	E-M	EM3	3	4	4
Pm IV	E-M	EM4	4	5	2
Pm IV	E-H	EH1	3	6	2
Pm IV	E-H	EH2	2	4	3
Pm IV	E-H	EH3	2	2	2
Pm IV	E-H	EH4	4	3	4

## Sheet: analysis3_L
species	treatment	replicate	day.dispersal	no.inoculation.plate	no.dispersal.plate
Pm I	E-L	EL1-EL1	6	5	1
Pm I	E-L	EL2-EL2	6	6	1
Pm I	E-L	EL3-EL3	7	8	2
Pm I	E-L	EL4-EL4	6	6	1
Pm III	E-L	EL1-EL1	8	86	3
Pm III	E-L	EL2-EL2	9	94	3
Pm III	E-L	EL3-EL3	10	140	4
Pm III	E-L	EL4-EL4	10	122	4
Pm I	L-L	L1-L1	4	6	1
Pm I	L-L	L2-L2	3	5	1
Pm I	L-L	L3-L3	3	5	1
Pm III	L-L	L1-L1	6	31	10
Pm III	L-L	L2-L2	7	50	15
Pm III	L-L	L3-L3	6	43	13

## Sheet: analysis3_M
species	treatment	replicate	day.dispersal	no.inoculation.plate	no.dispersal.plate
Pm I	E-M	E1-M1	4	5	1
Pm I	E-M	E2-M2	4	7	2
Pm I	E-M	E3-M3	5	5	1
Pm I	E-M	E4-M4	7	6	1
Pm III	E-M	E1-M1	5	11	1
Pm III	E-M	E2-M2	8	17	1
Pm III	E-M	E3-M3	7	15	1
Pm III	E-M	E4-M4	5	9	1
Pm I	L-M	L1-M1	2	5	1
Pm I	L-M	L2-M2	3	3	3
Pm I	L-M	L3-M3	2	6	2
Pm III	L-M	L1-M1	1	6	2
Pm III	L-M	L2-M2	2	7	1
Pm III	L-M	L3-M3	2	4	1
Pm I	M-M	M1-M1	5	4	2
Pm I	M-M	M2-M2	6	5	2
Pm I	M-M	M3-M3	5	3	3
Pm III	M-M	M1-M1	4	18	1
Pm III	M-M	M2-M2	4	15	2
Pm III	M-M	M3-M3	5	22	1

## Sheet: analysis3_H
species	treatment	replicate	day.dispersal	no.inoculation.plate	no.dispersal.plate
Pm I	E-H	E1-H1	3	5	1
Pm I	E-H	E2-H2	3	4	3
Pm I	E-H	E3-H3	4	4	3
Pm I	E-H	E4-H4	4	5	3
Pm III	E-H	E1-H1	5	17	2
Pm III	E-H	E2-H2	4	11	2
Pm III	E-H	E3-H3	7	23	2
Pm III	E-H	E4-H4	5	21	2
Pm I	L-H	L1-H1	3	4	3
Pm I	L-H	L2-H2	4	5	1
Pm I	L-H	L3-H3	4	4	2
Pm III	L-H	L1-H1	3	5	3
Pm III	L-H	L2-H2	4	6	2
Pm III	L-H	L3-H3	3	5	2
Pm I	M-H	M1-H1	7	11	3
Pm I	M-H	M2-H2	8	15	3
Pm I	M-H	M3-H3	5	7	4
Pm III	M-H	M1-H1	9	101	2
Pm III	M-H	M2-H2	11	135	1
Pm III	M-H	M3-H3	7	92	3
Pm I	H-H	H1-H1	1	3	3
Pm I	H-H	H2-H2	1	3	2
Pm I	H-H	H3-H3	1	3	3
Pm III	H-H	H1-H1	3	5	1
Pm III	H-H	H2-H2	2	5	1
Pm III	H-H	H3-H3	3	7	1
